# Supplementary material
Source: PubMed Central journal article supplement (PMC6020075)
Supplement: NIHMS974343-supplement-Supplemental_Figures_and_Tables.pdf [file NIHMS974343-supplement-Supplemental_Figures_and_Tables.pdf]

Supplemental Figure 1

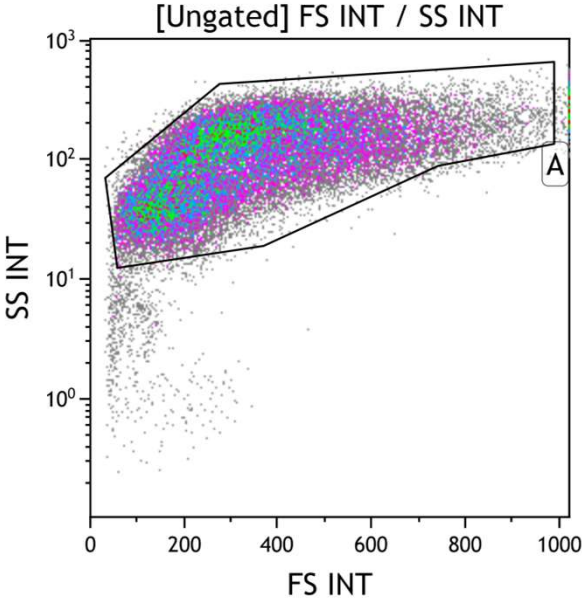

# Supplemental Figure 2

Unstained Fc blocked  
macrophages

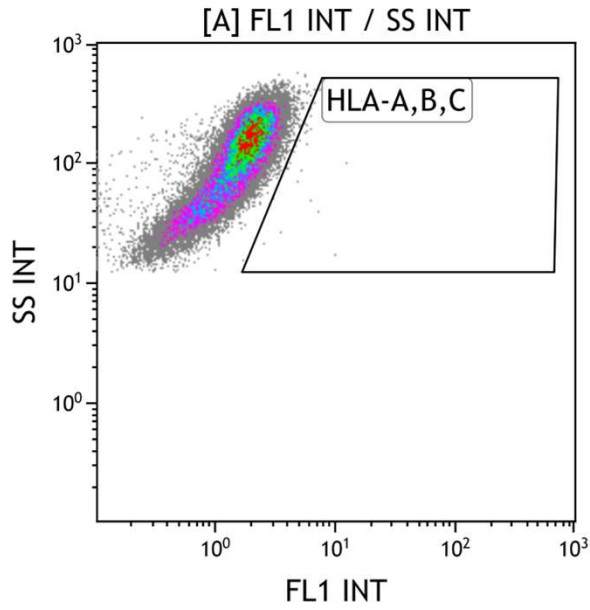

Stained Fc blocked  
macrophages

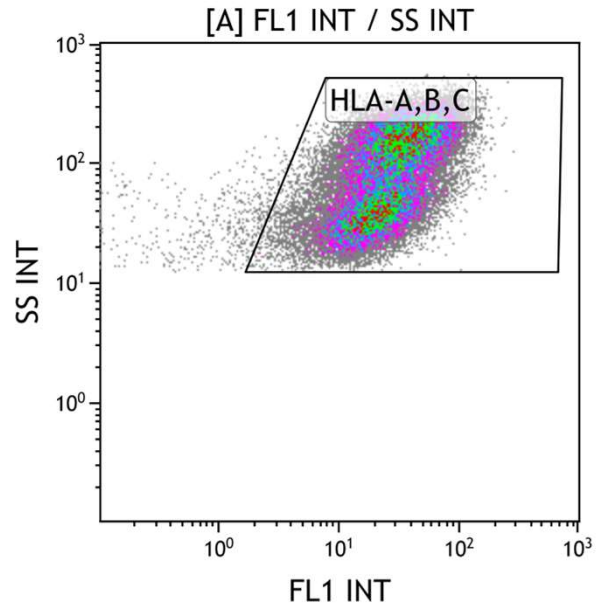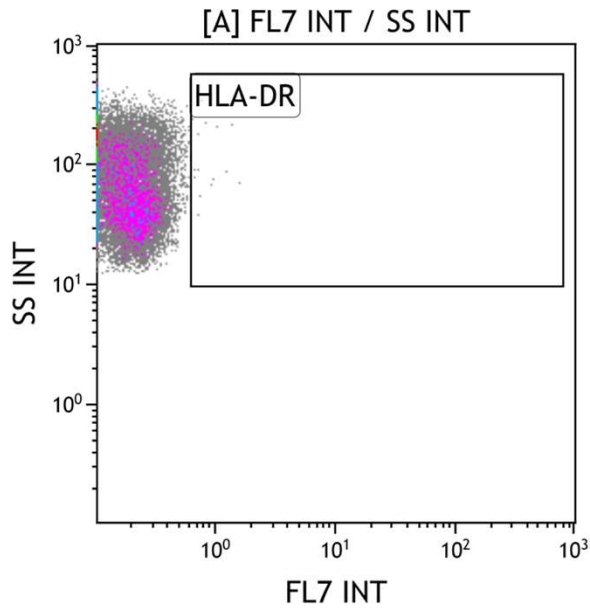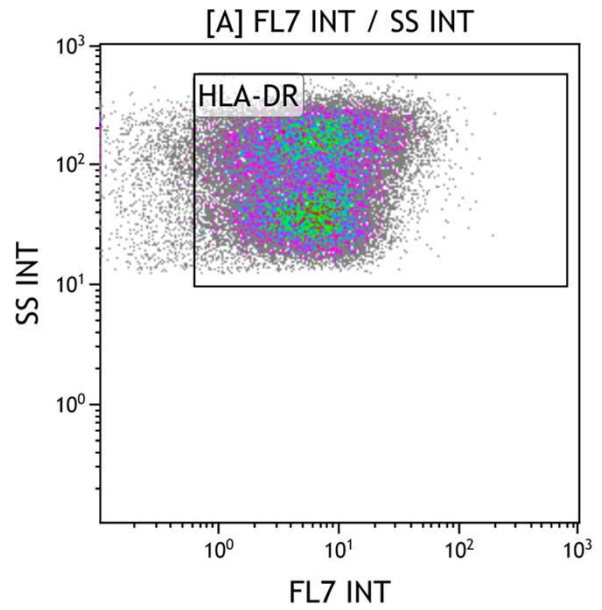

# Supplemental Figure 3

## Unstained Fc blocked macrophages

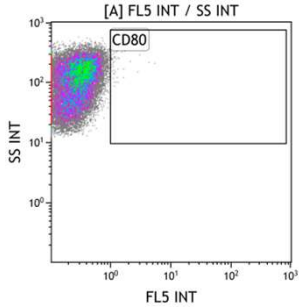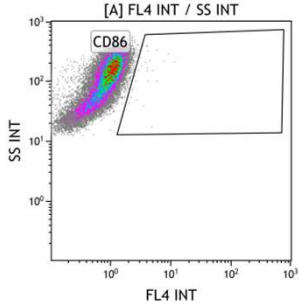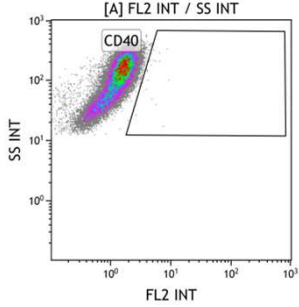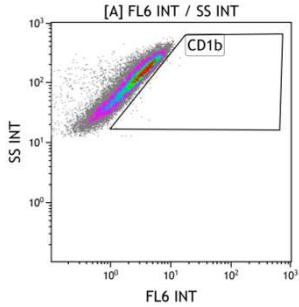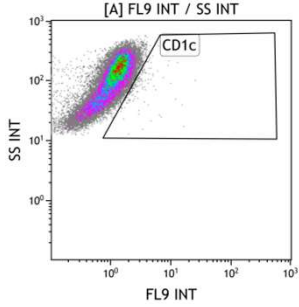

## Stained Fc blocked macrophages

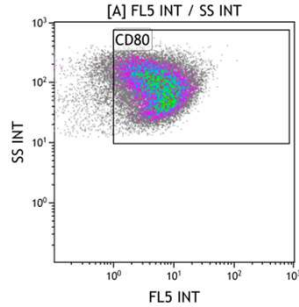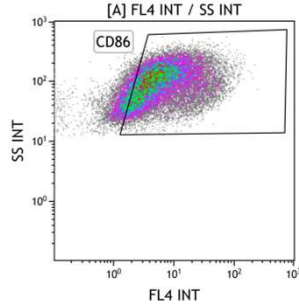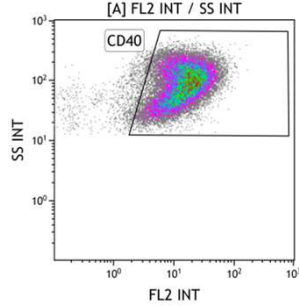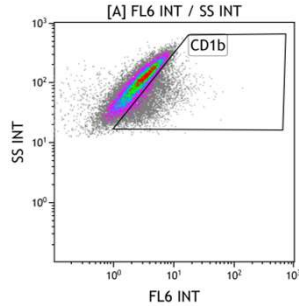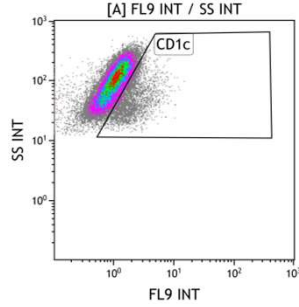

**Supplemental Table 1**

| <b>CD14</b>     | <b>Control</b> | <b>HLF 10</b> |
|-----------------|----------------|---------------|
| <b>IL-12p40</b> | 0+/-0          | 0.25+/-0.87   |
| <b>IL-10</b>    | 20.33+/-8.32   | 25.17+/-9.57  |
| <b>TNF-a</b>    | 2.42+/-3.73    | 3.33+/-5.12   |
| <b>IL-6</b>     | 24.58+/-31.51  | 25.33+/-28.48 |
| <b>IL-1b</b>    | 0+/-0          | 0.33+/-1.16   |
| <b>MCP-1</b>    | 854+/-258      | 813+/-199     |
| <b>IL-8</b>     | 737+/-329      | 651+/-390     |

**Supplemental Table 1: Effect of lactoferrin to affect naïve CD14<sup>+</sup> macrophages cytokine and chemokine production.** CD14<sup>+</sup> monocyte derived macrophages were cultured with and without recombinant human lactoferrin (HLF, 10µg/mL) for 72 hours. Supernatants were analyzed by ELISA. Data reported as mean +/- standard deviation in pg/mL.

**Supplemental Table 2**

| <b>CD16</b>     | <b>Control</b> | <b>HLF 10</b> |
|-----------------|----------------|---------------|
| <b>IL-12p40</b> | 0+/-0          | 0+/-0         |
| <b>IL-10</b>    | 22.88+/-18.36  | 15.25+/-6.16  |
| <b>TNF-a</b>    | 5.13+/-8.04    | 2.25+/-3.96   |
| <b>IL-6</b>     | 16.5+/-14.09   | 17.13+/-14.33 |
| <b>IL-1b</b>    | 0+/-0          | 0+/-0         |
| <b>MCP-1</b>    | 582+/-206      | 656+/-221 **  |
| <b>IL-8</b>     | 542+/-438      | 623+/-505     |

**Supplemental Table 2: Effect of lactoferrin to affect naïve CD16<sup>+</sup> macrophages cytokine and chemokine production.** CD16<sup>+</sup> monocyte derived macrophages were cultured with and without recombinant human lactoferrin (HLF, 10µg/mL) for 72 hours. Supernatants were analyzed by ELISA. Data reported as mean +/- standard deviation in pg/mL. \*\*=p<0.01

**Supplemental Table 3**

| CD14      | % Positive Cells |                | Geometric MFI |              |
|-----------|------------------|----------------|---------------|--------------|
|           | Control          | HLF 10         | Control       | HLF 10       |
| HLA-A,B,C | 99.4+/-0.67      | 99.49+/-0.69   | 43.9+/-4.84   | 44.97+/-6.41 |
| HLA-DR    | 97.18+/-1.61     | 97.67+/-1.09   | 11.98+/-1.32  | 12.75+/-1.78 |
| CD80      | 31.69+/-12.55    | 33.32+/-12.02  | 2.37+/-0.39   | 2.29+/-0.38  |
| CD86      | 67.61+/-6.16     | 75.6+/-2.51 ** | 4.85+/-0.14   | 5.1+/-0.23 * |
| CD40      | 50.31+/-9.06     | 51.99+/-13.68  | 6.31+/-0.59   | 6.31+/-0.36  |
| CD1b      | 5.39+/-2.62      | 6.14+/-3.28    | 6.7+/-2.78    | 6.66+/-2.84  |
| CD1c      | 2.98+/-3.39      | 3.9+/-4.82     | 2.63+/-0.44   | 2.66+/-0.43  |

**Supplemental Table 3: Effect of lactoferrin to affect naïve CD14<sup>+</sup> macrophages surface marker expression.** CD14<sup>+</sup> monocyte derived macrophages were cultured with and without recombinant human lactoferrin (10µg/mL) for 72 hours. Cells were collected and analyzed by flow cytometry for surface marker expression. Data reported as mean +/- standard deviation. \*= $p < 0.05$  \*\*= $p < 0.01$

**Supplemental Table 4:**

| CD16      | % Positive Cells |                 | Geometric MFI |                |
|-----------|------------------|-----------------|---------------|----------------|
|           | Control          | HLF 10          | Control       | HLF 10         |
| HLA-A,B,C | 99.52+/-0.58     | 99.47/-0.77     | 48.86+/-7.02  | 50.04+/-8.05   |
| HLA-DR    | 95.82+/-2.23     | 95.59+/-1.80    | 13.92+/-2.67  | 13.45+/-2.75   |
| CD80      | 34.60+/-8.18     | 33.90+/-7.99    | 2.36+/-0.24   | 2.28+/-0.25    |
| CD86      | 70.08+/-10.3     | 75.47+/-9.29 ** | 5.09+/-0.70   | 5.32+/-0.59 ** |
| CD40      | 49.55+/-4.76     | 50.31+/-9.39    | 6.81+/-1.07   | 6.68+/-0.83    |
| CD1b      | 7.04+/-1.93      | 6.14+/-1.34     | 7.63+/-2.86   | 7.77+/-3.11    |
| CD1c      | 1.54+/-1.08      | 1.25+/-0.79     | 2.88+/-0.34   | 2.81+/-0.24    |

**Supplemental Table 4: Effect of Lactoferrin to affect naïve CD16<sup>+</sup> macrophages surface marker expression.** CD16<sup>+</sup> monocyte derived macrophages were cultured with and without recombinant human lactoferrin (10µg/mL) for 72 hours. Cells were collected and analyzed by flow cytometry for surface marker expression. Data reported as mean +/- standard deviation. \*\*= $p < 0.01$
